# Supplementary material for: Hairpin-functionalized DNA tetrahedra for miRNA imaging in living cells via self-assembly to form dendrimers
Source: Royal Society of Chemistry journal article supplement (doi:10.1039/d2an00080f), 2022-01-01
Supplement: d2an00080f1.pdf [file d2an00080f1.pdf]

## Supporting Information

### **Hairpin-functionalized DNA tetrahedral for miRNA imaging in living cells via self-assembly to form dendrimers**

Wenjing Zhao<sup>‡</sup>, Yao Jiang<sup>‡\*</sup>, Huimin Zhou, Shusheng Zhang<sup>\*</sup>

*Shandong Provincial Key Laboratory of Detection Technology for Tumor Markers, Collaborative Innovation Center of Tumor Marker Detection Technology, Equipment and Diagnosis-Therapy Integration in Universities of Shandong, College of Chemistry and Chemical Engineering, Linyi University, Linyi 276005, P. R. China*

Table S1. Sequences of Oligonucleotides Used in This Study

| Name         | Sequence (5' -3' )                                                                |
|--------------|-----------------------------------------------------------------------------------|
| H1           | GACGACTAATAAGATTCAACATCAG/iBHQ1- $\beta$ T/CTGATAAGCGCGCTTCATAGGCGCTTATCAGACT-FAM |
| H2           | TGTCCTAATTAGAATATAAGCGCTCCGAGCCGGTCGAAATGAGAGCGCGCTTATCAGACACCGGCTCGGAG           |
| A1           | ATCTTATTAGTCGTCTTCTCCAAGTCTACCTTGCTACACGACGCCATAGTAAAAAAAAAAAA                    |
| A2           | ATTCTAATTAGGACATTACAGCAGTGCAGTGTAGCAAGAGGCGAGGGTCC                                |
| A3           | ATCTTATTAGTCGTCTTCACTGCTGTGAAACACTACGTGTCTACTATGGCG                               |
| A4           | ATTCTAATTAGGACATTAGACTTGGAGGCCACGTAGTGTGTTGGACCCTCGC                              |
| miRNA-21     | UAGCUUAUCAGACUGAUGUUGA                                                            |
| miRNA-141    | UACACUGUCUGGUAAGAUGG                                                              |
| Let-7a       | UGAGGUAGUAGGUUGUAUAGUU                                                            |
| Let-7b       | UGAGGUAGUAGGUUGUGUGGUU                                                            |
| Let-7c       | UGAGGUAGUAGGUUGUAUGGUU                                                            |
| MUC1 aptamer | GGCTATAGCACATGGGTAACGACTTTTTTTTTTT                                                |

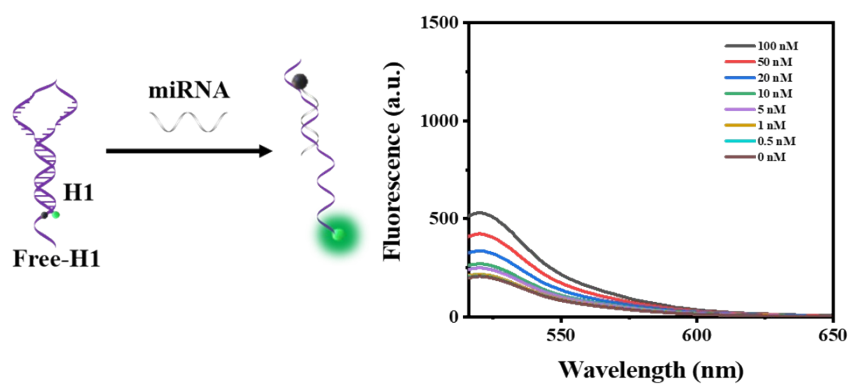

Figure S1. In vitro fluorescence response of free-H1. Schematic and fluorescence emission spectra of free-H1 with various concentrations of miRNA-21.

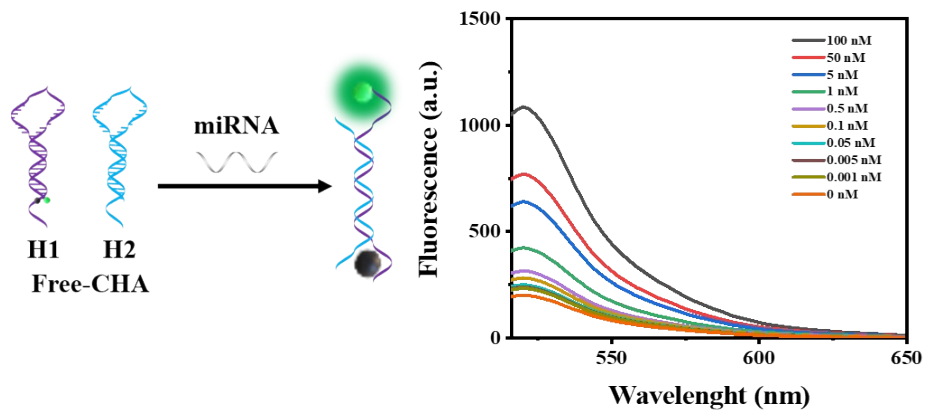

Figure S2. In vitro

of fluorescence response of free-CHA. Schematic and fluorescence emission spectra of free-CHA with various concentrations of miRNA-21.

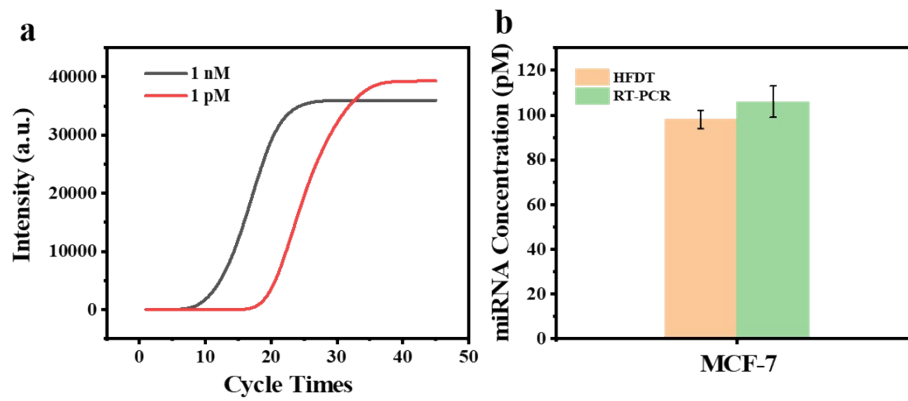

Figure S3. (a) RT-PCR measurements of miRNA-21 levels in different concentrations. (b) Measurements of miRNA-21 levels in MCF-7 cells by the HDFT and RT-PCR.

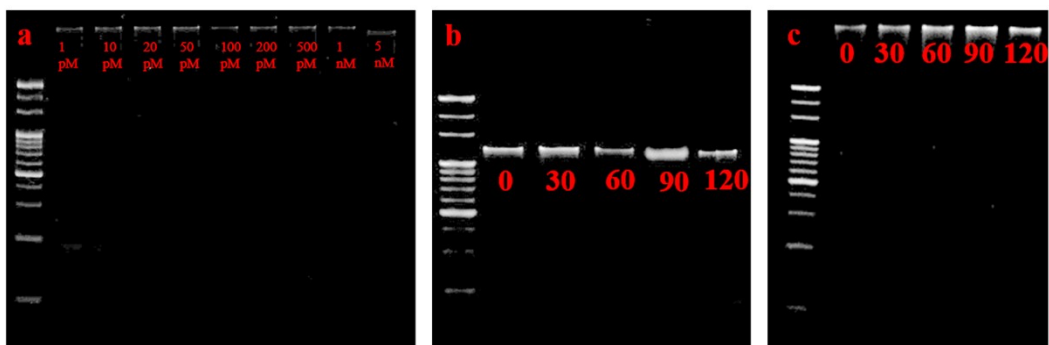

Figure S4. PPAGE characterization of (a) HFDT with different concentrations of miRNA; the stability of the (b) HFDT and (c) target-triggered assembly dendrimers structure.

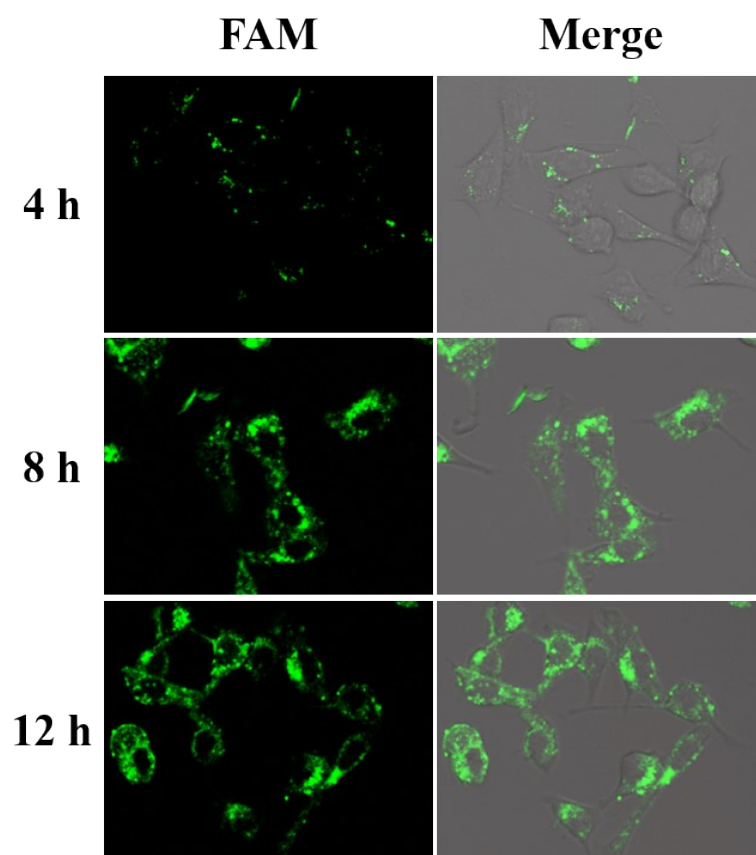

Figure S5. Confocal fluorescence images of MCF-7 cells after incubation with HFDT at different times.

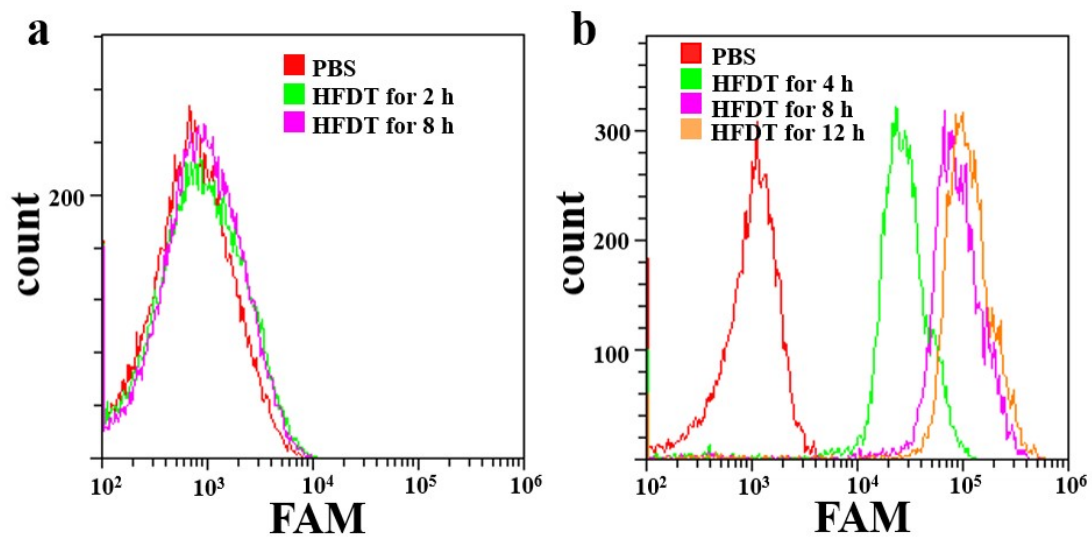

Figure S6. Flow cytometric quantification of (a) L02 cells and (b) MCF-7 cells treated with PBS and HDFT in different times.



Table S2. The summary of recent miRNA-21 analytical methods in comparison with our strategy.

| Analysis method                                                        |                             | Detection<br>Technique | LOD    | Reference |
|------------------------------------------------------------------------|-----------------------------|------------------------|--------|-----------|
| DNA<br>based<br>biosensor                                              | tetrahedrons<br>fluorescent | Fluorescence           | 620 pM | 1         |
| Strand displacement<br>reaction                                        |                             | Photoluminescence      | 4.5 pM | 2         |
| Pyrenelabelled Y-shape<br>DNA nanoprobe based<br>Fluorescent biosensor |                             | Fluorescence           | 200 pM | 3         |
| Accelerated-DzFN                                                       |                             | Fluorescence           | 1.2 pM | 4         |
| DNA<br>(HFDT)                                                          | tetrahedron                 | Fluorescence           | 0.8 pM | This work |

## References

1. W. Zhou, D. Li, C. Xiong, R. Yuan and Y. Xiang, *ACS Appl. Mater. Inter.*, 2016, 8, 13303-13308.
2. X. He, T. Zeng, Z. Li, G. Wang and N. Ma, *Angew. Chem. Int. Ed. Engl.*, 2016, 55, 3073-3076.
3. Z. Chen, J. Lu, F. Xiao, Y. Huang, X. Zhang and L. Tian, *Chem. Commun.*, 2020, 56, 1501-1504.
4. Y. Wu, H. Meng, J. Chen, K. Jiang, R. Yang, Y. Li, K. Zhang, L. Qu, X. Zhang and Z. Li, *Chem. Commun.*, 2020, 56, 470-473.
